# Supplementary material for: A smart theranostic platform for photoacoustic and magnetic resonance dual-imaging-guided photothermal-enhanced chemodynamic therapy
Source: Royal Society of Chemistry journal article supplement (doi:10.1039/c9nr10039c), 2020-01-01
Supplement: c9nr10039c1.pdf [file c9nr10039c1.pdf]

## Supporting Information

### A Smart Theranostic Platform for Photoacoustic and Magnetic Resonance Dual-imaging-guided Photothermal-Enhanced Chemodynamic therapy

Haimei Wang, Lu An, Cheng Tao, Ziyi Ling, Jiaomin Lin, Qiwei Tian\* and Shiping Yang\*

\*E-mail: shipingy@shnu.edu.cn, qiweitian@shnu.edu.cn

## Figures

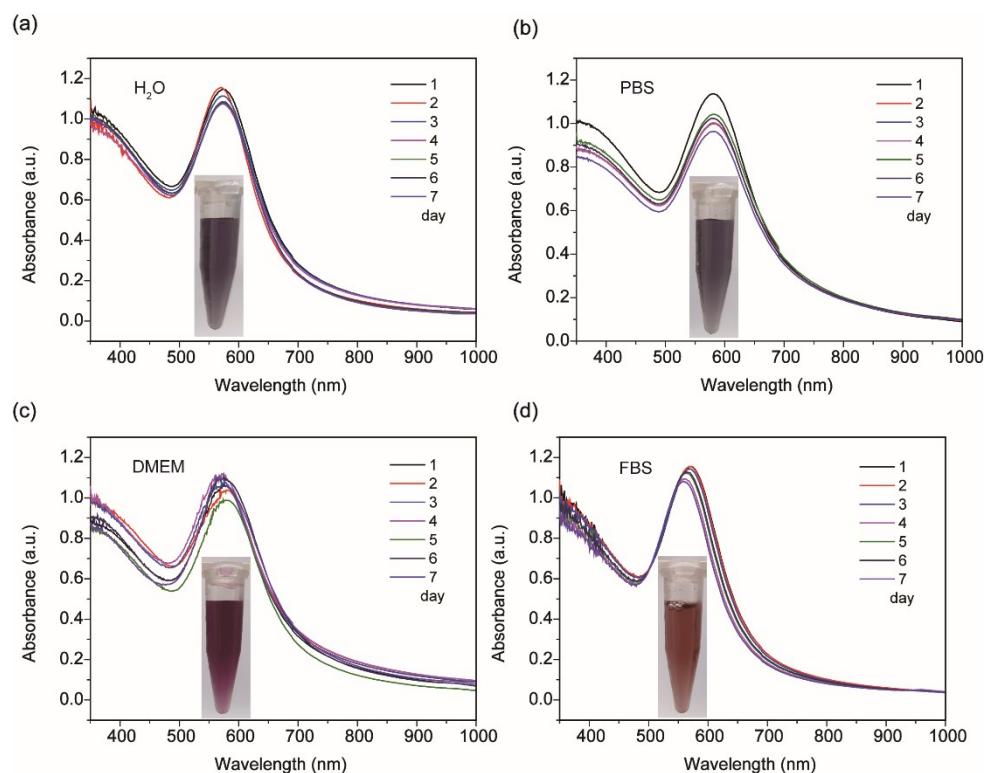

**Figure S1.** Stability of Au@MnO<sub>2</sub> dispersed in different physiological solutions within one week and corresponding photograph (inset) after one week. (a) water, (b) PBS, (c) DMEM and (d) FBS.

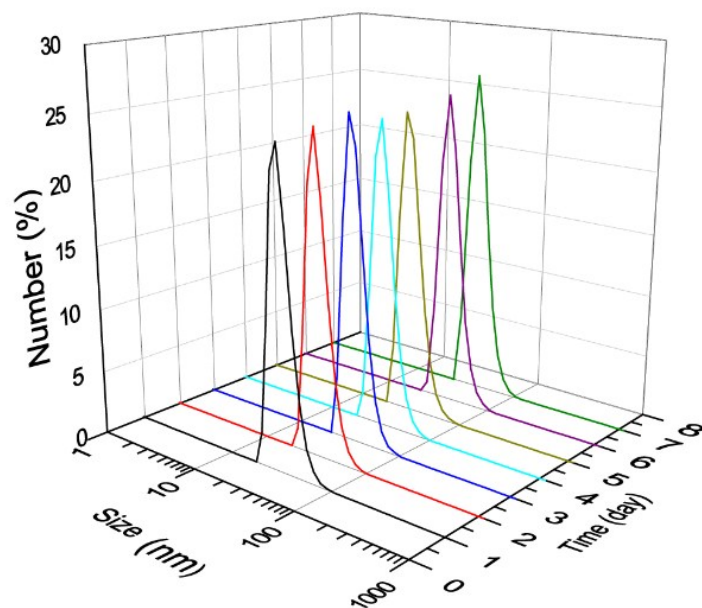

**Figure S2.** Hydrodynamic diameter of prepared Au nanoparticles dispersed in water over one week, indicating a good stability.

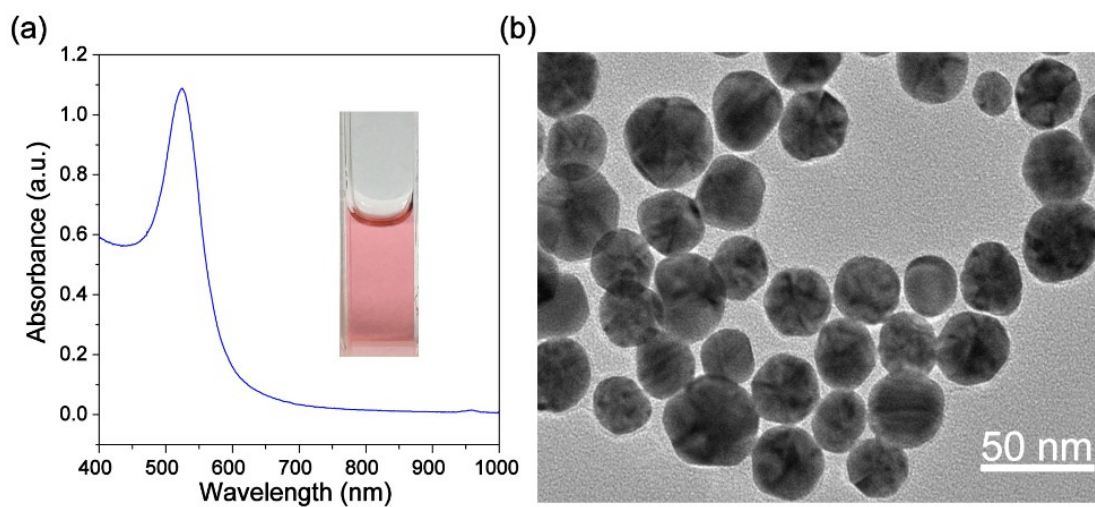

**Figure S3.** (a) Absorption and photograph (inset) of the Au nanosphere water dispersion. (b) Transmission electron microscopy (TEM) image of the Au nanospheres.

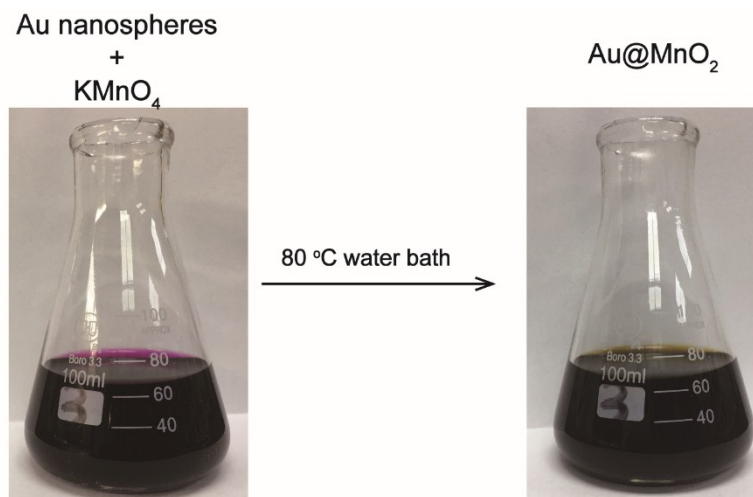

**Figure S4.** The preparation of Au@MnO<sub>2</sub> and the color change before and after reaction.

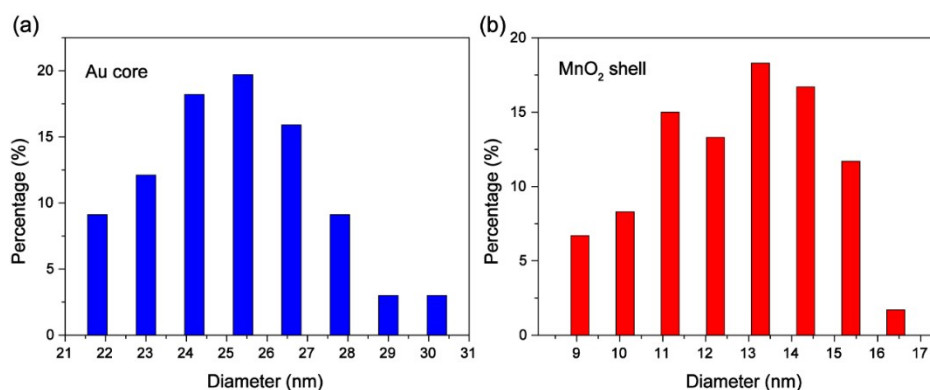

**Figure S5.** (a) The size distribution of the gold (Au) core. (b) The thickness of the manganese dioxide (MnO<sub>2</sub>) shell.

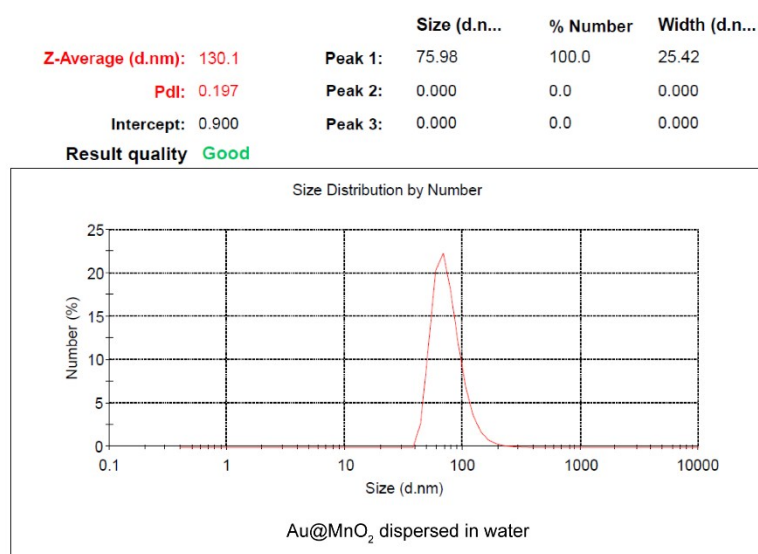

**Figure S6.** The Hydrodynamic diameter of prepared Au@MnO<sub>2</sub> collected by dynamic light scattering.

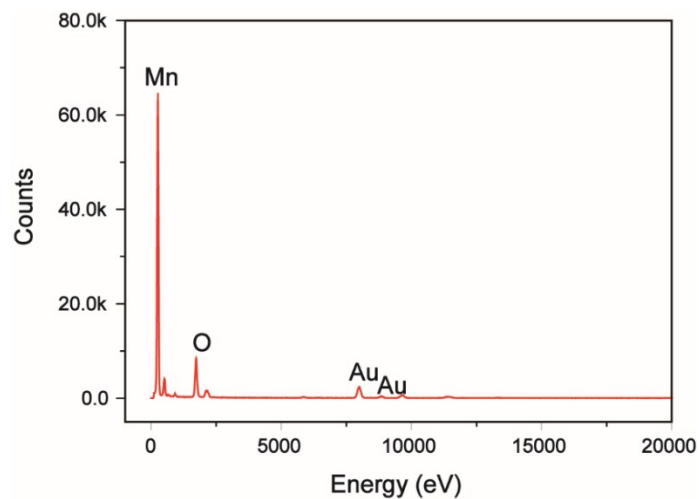

**Figure S7.** EDS spectrum of Au@MnO<sub>2</sub> nanoparticles.

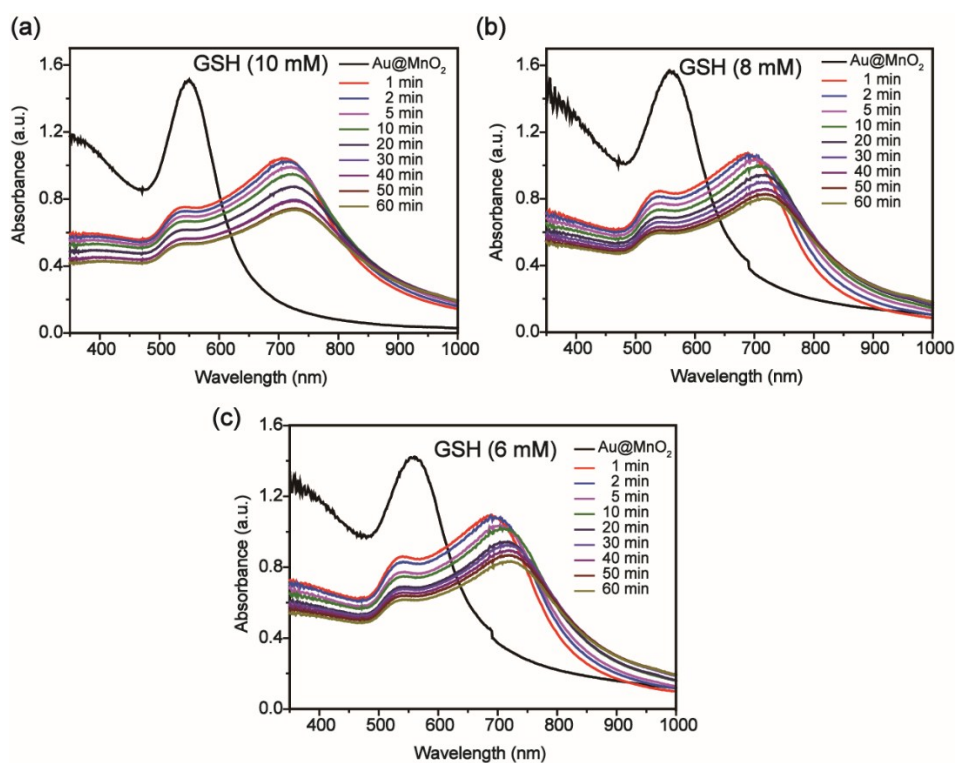

**Figure S8.** UV-Vis-NIR absorption spectra of Au@MnO<sub>2</sub> at different times after addition of (a) 6 mM, (b) 8 mM and (c) 10 mM GSH.

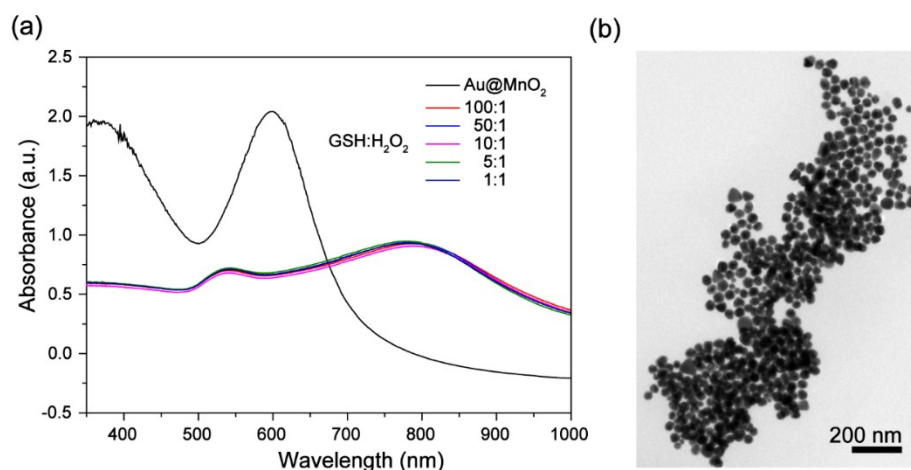

**Figure S9** (a) Absorption spectra of Au@MnO<sub>2</sub> in the presence of GSH and H<sub>2</sub>O<sub>2</sub> with different ratio (100:1, 50:1, 10:1, 5:1 and 1:1); (b) TEM image of the Au@MnO<sub>2</sub> in the presence of GSH and H<sub>2</sub>O<sub>2</sub> with ratio of 1: 1.

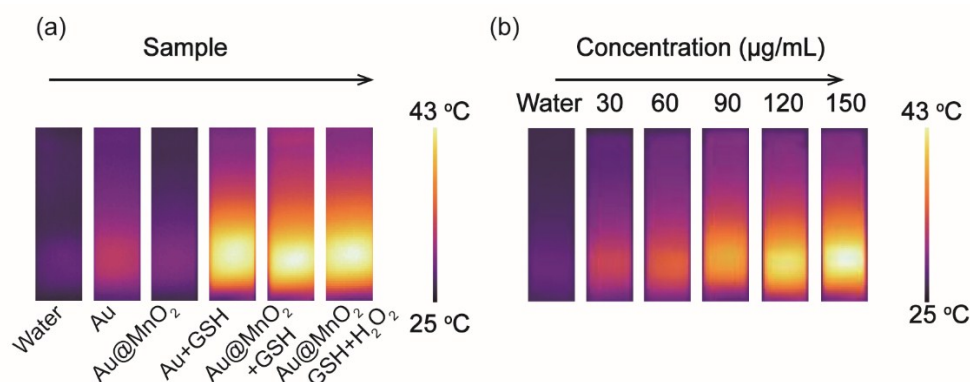

**Figure S10.** Thermal images of (a) water (control), gold (Au), gold@manganese dioxide (Au@MnO<sub>2</sub>), Au+GSH, Au@MnO<sub>2</sub>+GSH, Au@MnO<sub>2</sub>+GSH +H<sub>2</sub>O<sub>2</sub> and (b) an Au@MnO<sub>2</sub> aqueous dispersion with different concentrations (30, 60, 90, 120, and 150 µg/mL) in the presence of GSH after 15 min of 808 nm laser (1W/cm<sup>2</sup>) irradiation. Here, the Au is a nanosphere and GSH concentration is 10 mM and H<sub>2</sub>O<sub>2</sub> concentration is 1 mM.

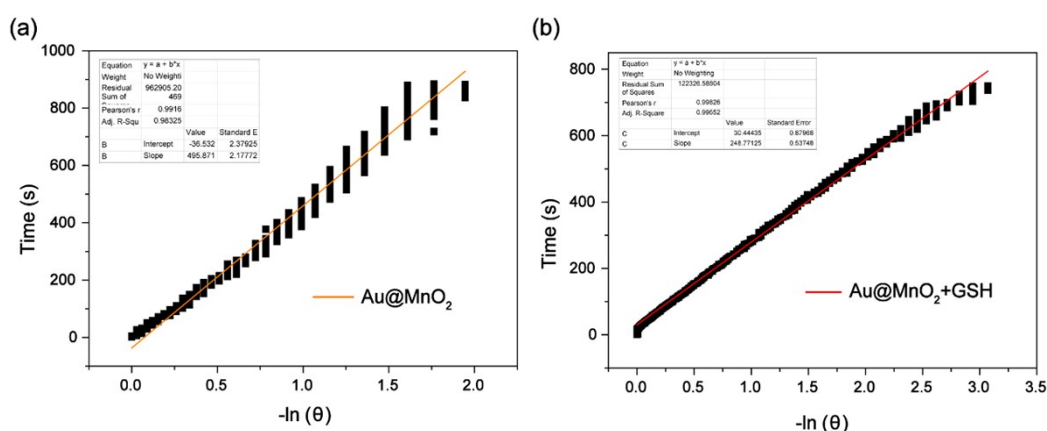

**Figure S11.** The time constant obtained for (a) gold@manganese dioxide (Au@MnO<sub>2</sub>) and (b) Au@MnO<sub>2</sub> in the presence of glutathione (GSH).



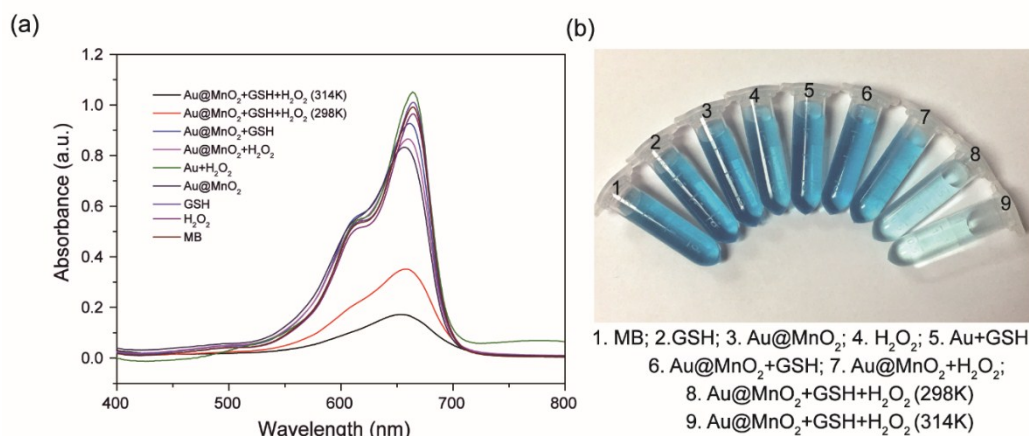

**Figure S12.** (a) The absorption and (b) corresponding photograph of the methylene blue (MB) solution after a 30 min incubation under different conditions.

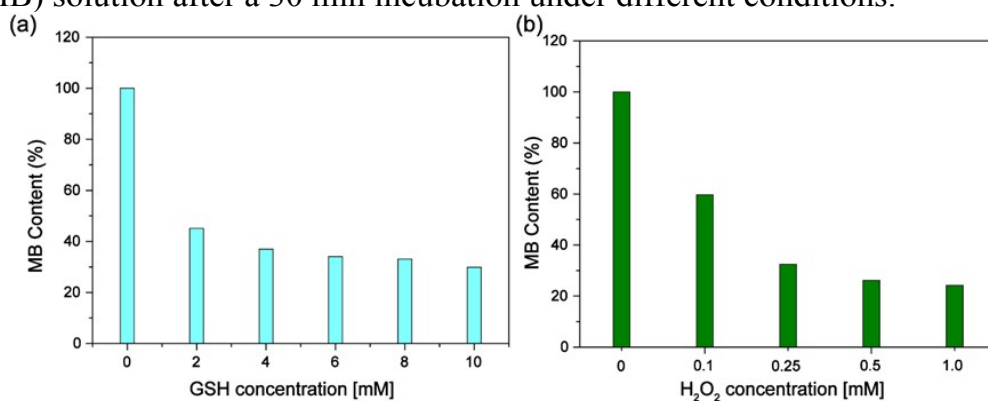

**Figure S13.** The methylene blue (MB) content after a 30 min incubation with (a) gold@manganese dioxide ( $\text{Au@MnO}_2$ ) in the presence of 1 mM  $\text{H}_2\text{O}_2$  with different glutathione (GSH) concentrations and (b)  $\text{Au@MnO}_2$  in the presence of 10 mM GSH with different  $\text{H}_2\text{O}_2$  concentrations.

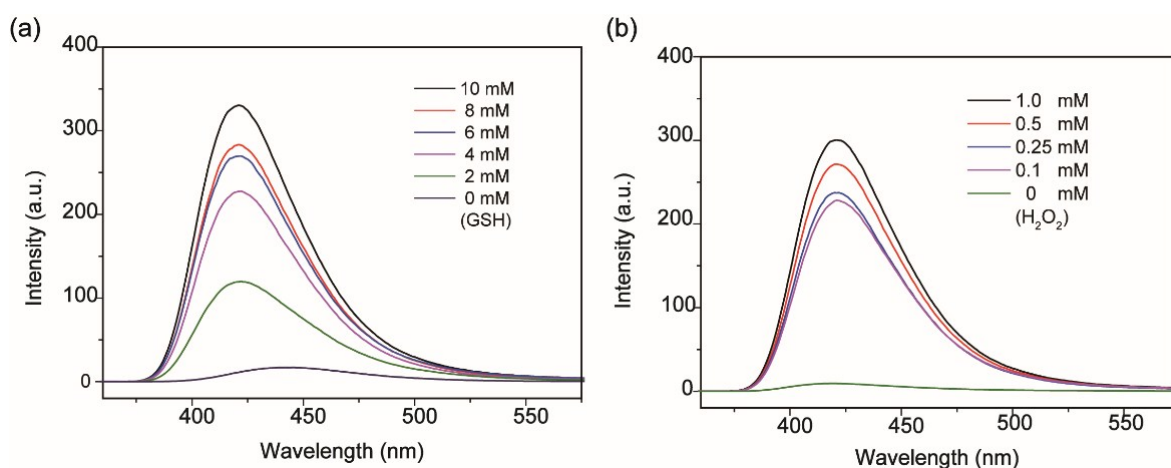

**Figure S14.** The fluorescence intensity of TPA solution mixed with different concentration of GSH or  $\text{H}_2\text{O}_2$ : (a) GSH concentration changed from 0 to 2, 4, 6, 8 and 10 mM and kept  $\text{H}_2\text{O}_2$  (1.0 mM); (b)  $\text{H}_2\text{O}_2$  concentration changed from 0 to 0.125, 0.25, 0.5, 0.75 and 1.0 mM and kept GSH (10 mM).

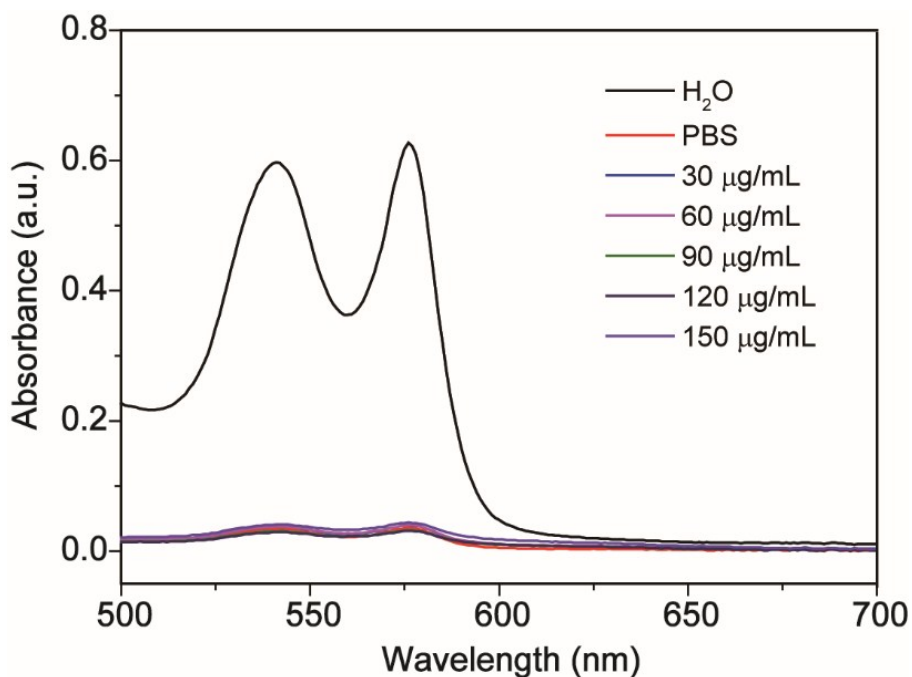

**Figure S15.** The absorption of the red blood cells (RBCs) supernate after being treated by different concentrations of Au@MnO<sub>2</sub>, PBS and water.

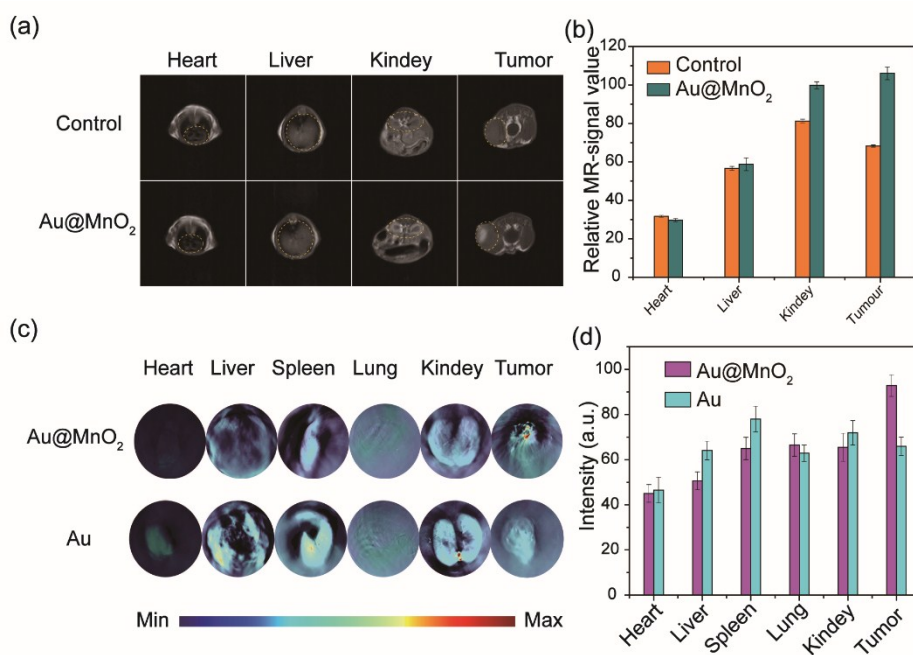

**Figure S16** (a) MR imaging and (b) corresponding MR signal of normal organs and tumors in mice without (control) and with intravenous injection of Au@MnO<sub>2</sub> nanoparticles after 8 h; (c) Photoacoustic imaging and (d) corresponding photoacoustic signal values of normal tissue and tumors after intravenous injection of Au@MnO<sub>2</sub> and Au nanoparticles for 8 h.

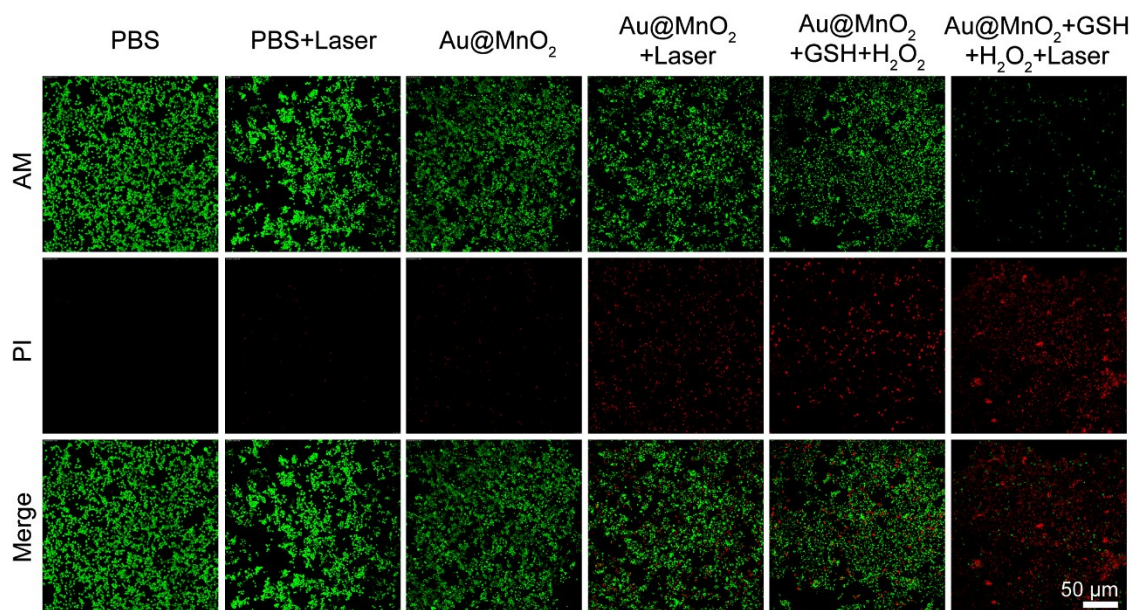

**Figure S17.** Confocal laser scanning microscopy images of the cell treated by different condition, which the live and dead cells are dyed by calcein-AM (green fluorescence) and propidium iodide (PI, red fluorescence) respectively. The incubation concentration of the Au@MnO<sub>2</sub>, GSH, H<sub>2</sub>O<sub>2</sub> are 75 ug/mL, 1 mM and 0.1 mM respectively. The laser is 808 nm with the density of 1 W/cm<sup>2</sup> and the irradiation time is 10 mins.

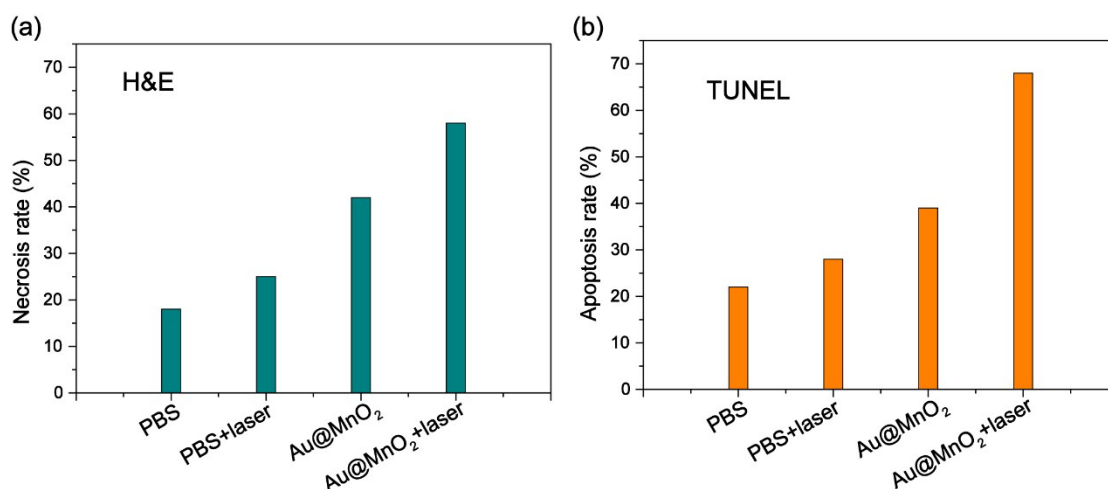

**Figure S18.** (a) The necrosis rate and (b) apoptosis rate obtained from tumor sections stained by hematoxylin and eosin (H&E) and terminal deoxynucleotidyl transferase dUTP nick end labeling (TUNEL), respectively.



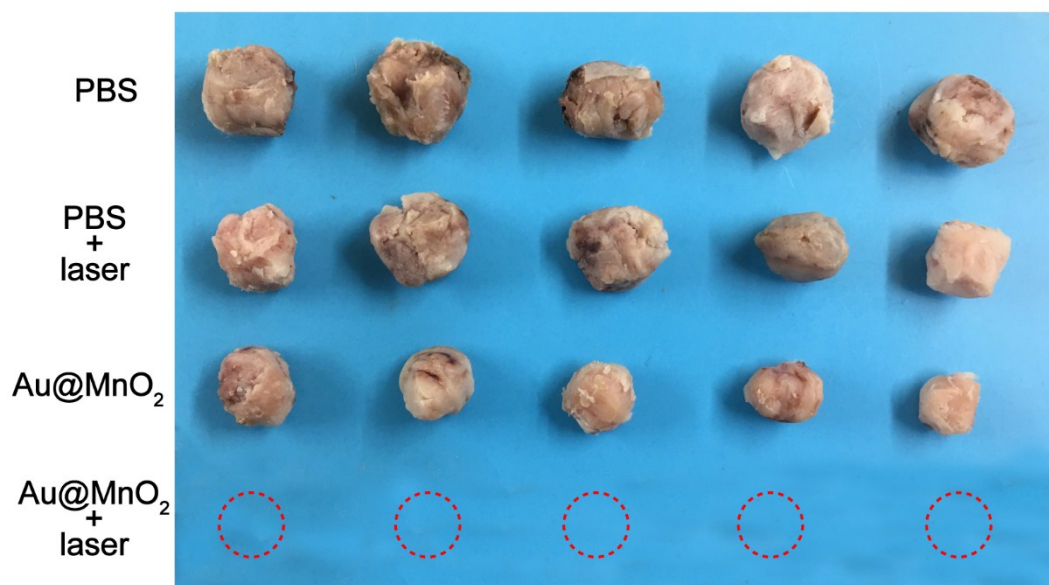

**Figure S19.** Photograph of the tumors taken from the mouse for each group after 16 days treatment.
